# Supplementary material for: Zinc Acetate Hydrate Supplementation versus Polaprezinc Supplementation for Improving Hypozincemia in Hemodialysis Patients: A Randomized Clinical Trial
Source: Hindawi journal article supplement (doi:10.1155/2023/2403755), 2023-10-05
Supplement: f1 [file 2403755.f1.pdf]

**Supplementary material** Changes in Parameters in the Study.

| ZAH group                                    |      | Baseline | 4 week  | 8 week  | 12 week | 16 week | 20 week | 24 week | 52 week | P value |
|----------------------------------------------|------|----------|---------|---------|---------|---------|---------|---------|---------|---------|
| Serum zinc <sup>a</sup> (µg/dL)              | Mean | 52.3     | 77.5    | 91.3    | 91.2    | 89.0    | 88.9    | 86.5    | 83.4    | <.001   |
|                                              | (SD) | (4.9)    | (21.4)  | (24.3)  | (26.3)  | (26.5)  | (22.7)  | (28.3)  | (19.9)  |         |
| Serum copper <sup>a</sup> (µg/dL)            | Mean | 89.1     | 90.4    | 84.5    | 75.7    | 70.6    | 69.5    | 74.5    | 83.6    | .003    |
|                                              | (SD) | (15.3)   | (18.3)  | (17.3)  | (25.3)  | (27.3)  | (28.5)  | (29.4)  | (24.3)  |         |
| Alkaline phosphatase <sup>a</sup> (U/L)      | Mean | 84.8     | 88.2    | 94.8    | 91.3    | 88.6    | 90.0    | 93.2    | 80.6    | .717    |
|                                              | (SD) | (30.2)   | (28.2)  | (31.2)  | (30.7)  | (27.8)  | (28.0)  | (33.8)  | (28.6)  |         |
| ALT <sup>a</sup> (U/L)                       | Mean | 11.3     | 12.5    | 13.5    | 12.3    | 12.9    | 12.0    | 12.4    | 14.3    | .819    |
|                                              | (SD) | (5.1)    | (5.6)   | (5.8)   | (5.7)   | (5.9)   | (6.0)   | (5.2)   | (7.9)   |         |
| AST <sup>a</sup> (U/L)                       | Mean | 13.4     | 14.0    | 14.7    | 13.8    | 13.7    | 13.4    | 13.2    | 16.9    | .985    |
|                                              | (SD) | (4.4)    | (5.5)   | (6.6)   | (4.5)   | (4.5)   | (4.5)   | (4.7)   | (10.6)  |         |
| LDH <sup>a</sup> (U/L)                       | Mean | 182.3    | 185.6   | 187.6   | 188.2   | 191.5   | 186.9   | 192.4   | 204.9   | .431    |
|                                              | (SD) | (37.2)   | (38.6)  | (31.3)  | (26.5)  | (37.2)  | (30.5)  | (38.5)  | (36.2)  |         |
| Total bilirubins <sup>a</sup> (mg/dL)        | Mean | 0.37     | 0.37    | 0.41    | 0.40    | 0.42    | 0.41    | 0.42    | 0.42    | .743    |
|                                              | (SD) | (0.12)   | (0.12)  | (0.13)  | (0.16)  | (0.16)  | (0.17)  | (0.19)  | (0.13)  |         |
| Serum Calcium <sup>a</sup> (mg/dL)           | Mean | 8.67     | 8.61    | 8.77    | 8.55    | 8.82    | 8.89    | 8.91    | 8.85    | .439    |
|                                              | (SD) | (0.56)   | (0.50)  | (0.69)  | (0.53)  | (0.70)  | (0.89)  | (0.66)  | (0.66)  |         |
| Serum creatinine <sup>a</sup> (mg/dL)        | Mean | 9.11     | 9.16    | 8.93    | 8.79    | 8.86    | 8.92    | 9.05    | 8.72    | 1.000   |
|                                              | (SD) | (2.51)   | (2.62)  | (2.68)  | (2.66)  | (2.78)  | (2.85)  | (2.91)  | (2.95)  |         |
| Serum chloride <sup>a</sup> (mEq/L)          | Mean | 101.8    | 102.1   | 103.2   | 102.8   | 102.3   | 102.0   | 101.7   | 103.1   | .424    |
|                                              | (SD) | (3.7)    | (3.6)   | (3.8)   | (3.1)   | (3.2)   | (3.2)   | (3.2)   | (3.5)   |         |
| Serum phosphate <sup>a</sup> (mg/dL)         | Mean | 5.3      | 5.1     | 5.1     | 5.1     | 5.1     | 5.0     | 5.0     | 5.2     | .949    |
|                                              | (SD) | (1.0)    | (1.1)   | (1.2)   | (1.5)   | (1.3)   | (1.1)   | (1.0)   | (1.2)   |         |
| Serum sodium <sup>a</sup> (mEq/L)            | Mean | 139.2    | 139.2   | 140.2   | 139.6   | 139.8   | 139.5   | 138.9   | 139.7   | .711    |
|                                              | (SD) | (3.1)    | (3.1)   | (2.6)   | (2.8)   | (2.3)   | (3.0)   | (2.9)   | (3.0)   |         |
| Serum potassium <sup>a</sup> (mEq/L)         | Mean | 4.5      | 4.6     | 4.4     | 4.4     | 4.5     | 4.5     | 4.5     | 4.4     | .992    |
|                                              | (SD) | (0.6)    | (0.8)   | (0.5)   | (0.6)   | (0.7)   | (0.7)   | (0.5)   | (0.5)   |         |
| Hemoglobin <sup>a</sup> (g/dL)               | Mean | 11.3     | 11.4    | 11.3    | 11.2    | 11.1    | 11.3    | 11.7    | 11.3    | .413    |
|                                              | (SD) | (1.1)    | (1.1)   | (0.9)   | (1.0)   | (1.0)   | (1.0)   | (1.0)   | (1.2)   |         |
| Glucose <sup>a</sup> (mg/dL)                 | Mean | 155.4    | 154.3   | 154.2   | 145.7   | 152.4   | 147.3   | 140.0   | 148.1   | .865    |
|                                              | (SD) | (53.8)   | (67.9)  | (48.8)  | (52.3)  | (52.4)  | (50.1)  | (51.5)  | (46.5)  |         |
| LDL-cholesterol <sup>a</sup> (mg/dL)         | Mean | 82.3     | 79.3    | 82.6    | 84.4    | 84.4    | 85.7    | 83.3    | 87.3    | .760    |
|                                              | (SD) | (18.7)   | (16.4)  | (18.2)  | (20.2)  | (21.2)  | (18.1)  | (24.5)  | (14.9)  |         |
| CRP <sup>a</sup> (mg/dL)                     | Mean | 0.99     | 1.52    | 0.69    | 0.70    | 1.06    | 0.39    | 2.08    | 0.56    | .750    |
|                                              | (SD) | (1.98)   | (3.53)  | (0.70)  | (1.70)  | (2.97)  | (0.44)  | (6.39)  | (1.25)  |         |
| Total cholesterol <sup>a</sup> (mg/dL)       | Mean | 141.6    | 140.9   | 142.9   | 147.2   | 144.2   | 142.7   | 144.6   | 147.9   | .901    |
|                                              | (SD) | (23.2)   | (20.6)  | (19.6)  | (20.9)  | (25.2)  | (23.3)  | (29.8)  | (15.5)  |         |
| Total protein <sup>a</sup> (g/dL)            | Mean | 6.1      | 6.1     | 6.2     | 6.2     | 6.1     | 6.1     | 6.2     | 6.2     | .969    |
|                                              | (SD) | (0.5)    | (0.5)   | (0.5)   | (0.4)   | (0.4)   | (0.4)   | (0.4)   | (0.5)   |         |
| Serum albumin <sup>a</sup> (g/dL)            | Mean | 3.38     | 3.37    | 3.47    | 3.45    | 3.46    | 3.46    | 3.52    | 3.54    | .409    |
|                                              | (SD) | (0.26)   | (0.30)  | (0.31)  | (0.28)  | (0.29)  | (0.29)  | (0.38)  | (0.33)  |         |
| Transthyretin <sup>a</sup> (mg/dL)           | Mean | 24.7     | 27.0    | 25.0    | 27.8    | 25.9    | 27.0    | 26.9    | 28.7    | .502    |
|                                              | (SD) | (5.5)    | (6.7)   | (4.3)   | (5.6)   | (6.4)   | (7.3)   | (7.4)   | (8.1)   |         |
| Urea nitrogen <sup>a</sup> (mg/dL)           | Mean | 57.9     | 58.0    | 57.3    | 55.3    | 54.6    | 50.9    | 54.9    | 54.0    | .591    |
|                                              | (SD) | (13.1)   | (13.4)  | (13.5)  | (14.4)  | (13.1)  | (14.6)  | (12.1)  | (13.1)  |         |
| BNP <sup>a</sup> (pg/mL)                     | Mean | 299.1    | 305.7   | 301.7   | 322.5   | 335.8   | 314.9   | 234.8   | 389.8   | .665    |
|                                              | (SD) | (241.5)  | (250.4) | (260.1) | (303.2) | (270.0) | (319.8) | (244.7) | (306.3) |         |
| Dry body weight <sup>a</sup> (kg)            | Mean | 57.9     | 58.3    | 57.9    | 57.4    | 57.3    | 57.4    | 58.2    | 59.2    | 1.000   |
|                                              | (SD) | (11.3)   | (11.5)  | (11.8)  | (12.5)  | (12.5)  | (12.6)  | (12.6)  | (14.5)  |         |
| Systolic blood pressure <sup>a</sup> (mmHg)  | Mean | 149.9    | 150.3   | 156.8   | 157.5   | 157.6   | 156.8   | 152.4   | 156.8   | .784    |
|                                              | (SD) | (21.7)   | (26.3)  | (24.0)  | (27.2)  | (28.3)  | (19.0)  | (25.0)  | (28.3)  |         |
| Diastolic blood pressure <sup>a</sup> (mmHg) | Mean | 80.5     | 80.9    | 80.2    | 81.8    | 83.5    | 80.2    | 82.3    | 80.5    | .965    |
|                                              | (SD) | (15.1)   | (14.0)  | (13.5)  | (11.7)  | (15.8)  | (13.7)  | (11.5)  | (16.7)  |         |

| PPZ group                                    |      | Baseline | 4 week  | 8 week  | 12 week  | 16 week  | 20 week | 24 week | 52 week | P value |
|----------------------------------------------|------|----------|---------|---------|----------|----------|---------|---------|---------|---------|
| Serum zinc <sup>a</sup> (µg/dL)              | Mean | 52.4     | 68.1    | 77.8    | 77.4     | 79.5     | 77.4    | 80.8    | 79.9    | <.001   |
|                                              | (SD) | (5.2)    | (14.8)  | (22.4)  | (20.7)   | (18.0)   | (22.7)  | (20.2)  | (16.8)  |         |
| Serum copper <sup>a</sup> (µg/dL)            | Mean | 93.5     | 93.4    | 86.3    | 82.8     | 79.6     | 80.4    | 82.9    | 80.0    | .016    |
|                                              | (SD) | (17.0)   | (18.6)  | (17.8)  | (22.8)   | (23.2)   | (19.7)  | (17.6)  | (25.4)  |         |
| Alkaline phosphatase <sup>a</sup> (U/L)      | Mean | 83.5     | 91.4    | 87.6    | 90.7     | 96.8     | 86.8    | 87.0    | 86.2    | .998    |
|                                              | (SD) | (34.1)   | (43.7)  | (36.8)  | (44.2)   | (54.7)   | (40.9)  | (36.1)  | (37.7)  |         |
| ALT <sup>a</sup> (U/L)                       | Mean | 12.3     | 14.2    | 12.1    | 13.1     | 14.3     | 12.3    | 11.8    | 13.7    | .949    |
|                                              | (SD) | (5.7)    | (8.2)   | (7.1)   | (8.2)    | (10.6)   | (6.6)   | (5.9)   | (7.7)   |         |
| AST <sup>a</sup> (U/L)                       | Mean | 14.8     | 15.1    | 13.7    | 13.7     | 15.5     | 13.5    | 13.2    | 14.9    | .971    |
|                                              | (SD) | (9.4)    | (8.1)   | (6.8)   | (6.4)    | (9.5)    | (5.7)   | (6.1)   | (6.9)   |         |
| LDH <sup>a</sup> (U/L)                       | Mean | 176.5    | 181.9   | 178.1   | 172.4    | 172.4    | 170.0   | 175.3   | 189.5   | .920    |
|                                              | (SD) | (43.9)   | (48.5)  | (43.8)  | (30.6)   | (35.3)   | (33.4)  | (37.3)  | (52.0)  |         |
| Total bilirubins <sup>a</sup> (mg/dL)        | Mean | 0.37     | 0.38    | 0.39    | 0.39     | 0.36     | 0.36    | 0.40    | 0.38    | .955    |
|                                              | (SD) | (0.12)   | (0.12)  | (0.14)  | (0.13)   | (0.13)   | (0.11)  | (0.14)  | (0.08)  |         |
| Serum Calcium <sup>a</sup> (mg/dL)           | Mean | 8.79     | 8.69    | 8.61    | 8.62     | 8.58     | 8.67    | 8.75    | 8.64    | .827    |
|                                              | (SD) | (0.65)   | (0.52)  | (0.35)  | (0.50)   | (0.56)   | (0.48)  | (0.56)  | (0.50)  |         |
| Serum creatinine <sup>a</sup> (mg/dL)        | Mean | 9.69     | 9.75    | 9.47    | 9.77     | 9.52     | 9.79    | 9.80    | 9.48    | .996    |
|                                              | (SD) | (2.62)   | (3.01)  | (2.59)  | (2.73)   | (2.69)   | (2.80)  | (2.36)  | (2.70)  |         |
| Serum chloride <sup>a</sup> (mEq/L)          | Mean | 102.3    | 101.4   | 102.4   | 102.2    | 101.4    | 102.0   | 102.2   | 102.0   | .875    |
|                                              | (SD) | (3.4)    | (2.9)   | (2.7)   | (3.4)    | (3.1)    | (3.3)   | (2.9)   | (3.8)   |         |
| Serum phosphate <sup>a</sup> (mg/dL)         | Mean | 5.5      | 5.5     | 5.5     | 5.6      | 5.4      | 6.0     | 5.6     | 5.6     | .913    |
|                                              | (SD) | (1.4)    | (1.3)   | (1.4)   | (1.1)    | (1.5)    | (1.6)   | (1.4)   | (1.7)   |         |
| Serum sodium <sup>a</sup> (mEq/L)            | Mean | 138.5    | 138.1   | 138.7   | 138.2    | 138.0    | 139.0   | 138.7   | 138.3   | .942    |
|                                              | (SD) | (3.4)    | (2.9)   | (2.6)   | (3.4)    | (3.1)    | (3.2)   | (3.2)   | (3.3)   |         |
| Serum potassium <sup>a</sup> (mEq/L)         | Mean | 4.5      | 4.5     | 4.4     | 4.5      | 4.4      | 4.5     | 4.3     | 4.4     | .850    |
|                                              | (SD) | (0.6)    | (0.7)   | (0.7)   | (0.6)    | (0.6)    | (0.6)   | (0.6)   | (0.7)   |         |
| Hemoglobin <sup>a</sup> (g/dL)               | Mean | 11.2     | 11.3    | 11.4    | 11.3     | 11.4     | 11.1    | 11.2    | 11.2    | .964    |
|                                              | (SD) | (1.1)    | (1.1)   | (1.0)   | (1.0)    | (1.0)    | (1.1)   | (1.0)   | (1.2)   |         |
| Glucose <sup>a</sup> (mg/dL)                 | Mean | 141.1    | 153.2   | 136.4   | 147.1    | 147.9    | 140.2   | 128.1   | 126.5   | .857    |
|                                              | (SD) | (60.8)   | (78.2)  | (55.3)  | (80.9)   | (82.3)   | (59.5)  | (34.2)  | (55.0)  |         |
| LDL-cholesterol <sup>a</sup> (mg/dL)         | Mean | 83.5     | 83.4    | 84.3    | 82.0     | 81.0     | 81.7    | 85.0    | 84.3    | 1.000   |
|                                              | (SD) | (20.1)   | (21.0)  | (19.4)  | (18.2)   | (21.7)   | (20.2)  | (24.8)  | (22.7)  |         |
| CRP <sup>a</sup> (mg/dL)                     | Mean | 0.80     | 0.79    | 0.41    | 0.59     | 0.82     | 0.37    | 0.34    | 0.61    | .417    |
|                                              | (SD) | (1.20)   | (1.52)  | (0.86)  | (1.24)   | (1.99)   | (0.94)  | (0.92)  | (1.01)  |         |
| Total cholesterol <sup>a</sup> (mg/dL)       | Mean | 151.8    | 149.8   | 149.9   | 147.8    | 145.3    | 145.5   | 150.5   | 149.2   | .998    |
|                                              | (SD) | (25.4)   | (25.0)  | (23.8)  | (24.0)   | (29.1)   | (25.6)  | (33.1)  | (27.8)  |         |
| Total protein <sup>a</sup> (g/dL)            | Mean | 6.3      | 6.2     | 6.2     | 6.2      | 6.1      | 6.1     | 6.3     | 6.3     | .692    |
|                                              | (SD) | (0.5)    | (0.5)   | (0.6)   | (0.6)    | (0.6)    | (0.5)   | (0.5)   | (0.6)   |         |
| Serum albumin <sup>a</sup> (g/dL)            | Mean | 3.39     | 3.40    | 3.46    | 3.43     | 3.42     | 3.46    | 3.52    | 3.49    | .711    |
|                                              | (SD) | (0.32)   | (0.43)  | (0.34)  | (0.37)   | (0.40)   | (0.36)  | (0.34)  | (0.48)  |         |
| Transthyretin <sup>a</sup> (mg/dL)           | Mean | 23.9     | 25.8    | 24.6    | 26.9     | 25.6     | 26.5    | 26.6    | 28.1    | .794    |
|                                              | (SD) | (5.5)    | (7.8)   | (6.6)   | (6.9)    | (8.0)    | (7.2)   | (7.0)   | (9.8)   |         |
| Urea nitrogen <sup>a</sup> (mg/dL)           | Mean | 58.5     | 63.3    | 56.8    | 62.3     | 59.4     | 60.5    | 58.5    | 62.6    | .651    |
|                                              | (SD) | (14.0)   | (18.1)  | (14.6)  | (15.5)   | (17.4)   | (16.3)  | (15.5)  | (15.8)  |         |
| BNP <sup>a</sup> (pg/mL)                     | Mean | 329.4    | 407.4   | 354.1   | 446.2    | 451.8    | 379.6   | 238.7   | 243.8   | .917    |
|                                              | (SD) | (514.0)  | (986.3) | (644.4) | (1130.2) | (1092.2) | (744.7) | (239.5) | (269.3) |         |
| Dry body weight <sup>a</sup> (kg)            | Mean | 56.5     | 56.4    | 55.8    | 55.6     | 55.1     | 55.4    | 55.9    | 55.5    | .998    |
|                                              | (SD) | (9.0)    | (9.2)   | (9.3)   | (9.4)    | (9.6)    | (9.8)   | (9.5)   | (8.9)   |         |
| Systolic blood pressure <sup>a</sup> (mmHg)  | Mean | 150.4    | 151.8   | 150.6   | 149.8    | 147.9    | 147.3   | 147.6   | 151.9   | .989    |
|                                              | (SD) | (22.7)   | (21.6)  | (31.0)  | (24.4)   | (22.8)   | (22.2)  | (19.1)  | (17.6)  |         |
| Diastolic blood pressure <sup>a</sup> (mmHg) | Mean | 82.0     | 79.9    | 79.5    | 81.5     | 78.4     | 78.0    | 80.5    | 82.6    | .860    |
|                                              | (SD) | (12.6)   | (12.5)  | (13.9)  | (12.4)   | (11.3)   | (14.3)  | (12.1)  | (12.0)  |         |

<sup>a</sup> Wilcoxon test

Abbreviations: ALT, Alkaline aminotransferase; AST, Asparate aminotransferase; BNP, Human brain natriuretic peptide; CRP, C-relative protein; LDH, Lactate dehydrogenase.
